# Supplementary material
Source: PubMed Central journal article supplement (PMC6819262)
Supplement: NIHMS1537257-supplement-2.pdf [file NIHMS1537257-supplement-2.pdf]

**Supplementary Table 1a. Quantitative input strengths of Camk2a-Cre SUB excitatory neurons versus CA1-projecting SUB excitatory neurons**

| <b>Camk2a-Cre<br/>excitatory<br/>neurons</b>   | <b>CA1<br/>S.P.</b> | <b>CA1<br/>S.O.</b>              | <b>CA1<br/>S.R.</b> | <b>CA1<br/>S.L.M.</b> | <b>PrS</b> | <b>RSG</b> | <b>Vis<br/>Ctx</b> | <b>Au<br/>Ctx</b> | <b>TeA</b> | <b>PRh/<br/>Ect</b> | <b>LEn<br/>t</b> | <b>mEn<br/>t</b> | <b>ACC</b> | <b>MS-<br/>DB</b> | <b>Thala-<br/>mus</b> |
|------------------------------------------------|---------------------|----------------------------------|---------------------|-----------------------|------------|------------|--------------------|-------------------|------------|---------------------|------------------|------------------|------------|-------------------|-----------------------|
| <b>Average CSI</b>                             | 47.72               | 0.90                             | 0.14                | 0.17                  | 1.16       | 0.46       | 0.74               | 0.51              | 0.38       | 0.39                | 0.53             | 0.46             | 0.09       | 0.75              | 0.30                  |
| <b>SE</b>                                      | 2.69                | 0.22                             | 0.02                | 0.05                  | 0.13       | 0.19       | 0.22               | 0.29              | 0.15       | 0.08                | 0.20             | 0.11             | 0.03       | 0.15              | 0.08                  |
| <b>Average %</b>                               | 86.71               | 1.58                             | 0.26                | 0.31                  | 2.16       | 0.81       | 1.32               | 0.88              | 0.68       | 0.71                | 0.92             | 0.85             | 0.16       | 1.42              | 0.54                  |
| <b>SE</b>                                      | 1.56                | 0.36                             | 0.03                | 0.09                  | 0.35       | 0.30       | 0.35               | 0.46              | 0.26       | 0.12                | 0.30             | 0.22             | 0.06       | 21.34             | 0.15                  |
| <b># of starter</b>                            | 50 ± 8              | <b>Total labeled<br/>neurons</b> |                     |                       |            |            |                    | 2681 ± 372        | <b>N=5</b> |                     |                  |                  |            |                   |                       |
| <b>CA1-<br/>projecting<br/>SUB<br/>neurons</b> | <b>CA1<br/>S.P.</b> | <b>CA1<br/>S.O.</b>              | <b>CA1<br/>S.R.</b> | <b>CA1<br/>S.L.M.</b> | <b>PrS</b> | <b>RSG</b> | <b>Vis<br/>Ctx</b> | <b>Au<br/>Ctx</b> | <b>TeA</b> | <b>PRh/<br/>Ect</b> | <b>LEn<br/>t</b> | <b>mEn<br/>t</b> | <b>ACC</b> | <b>MS-<br/>DB</b> | <b>Thala-<br/>mus</b> |
| <b>Average CSI</b>                             | 14.90               | 4.00                             | 0.06                | 0.08                  | 0.54       | 0.47       | 3.27               | 0.76              | 0.00       | 0.00                | 0.00             | 0.00             | 0.00       | 0.49              | 0.06                  |
| <b>SE</b>                                      | 1.25                | 0.44                             | 0.06                | 0.08                  | 0.15       | 0.26       | 0.55               | 0.36              | 0.00       | 0.00                | 0.00             | 0.00             | 0.00       | 0.17              | 0.06                  |
| <b>Average %</b>                               | 60.28               | 16.19                            | 0.21                | 0.41                  | 2.20       | 2.01       | 13.18              | 2.88              | 0.00       | 0.00                | 0.00             | 0.00             | 0.00       | 1.99              | 0.21                  |
| <b>SE</b>                                      | 4.41                | 1.58                             | 0.21                | 0.41                  | 0.67       | 1.20       | 2.08               | 1.21              | 0.00       | 0.00                | 0.00             | 0.00             | 0.00       | 0.66              | 0.21                  |
| <b># of starter</b>                            | 3.2 ±<br>0.6        | <b>Total labeled<br/>neurons</b> |                     |                       |            |            |                    | 77 ± 13           | <b>N=6</b> |                     |                  |                  |            |                   |                       |

Note: The input connection strength index (CSI) is defined as the ratio of the number of presynaptic neurons in a given brain structure versus the number of starter neurons. % is the percentage of the total input, which is defined as the number of labeled neurons in a given brain structure compared to the total number of labeled neurons. The local SUB input quantification is excluded. All data are presented as mean ± SE

**Supplementary Table 1b. Statistic comparisons between input measurements of Camk2a-Cre SUB excitatory neuron and CA1-projecting SUB excitatory neuron**

| <b>CSI</b> | <b>Comparisons of CSI, related to Figure2</b> | <b>Statistic Method</b> | <b>Significance</b> | <b>P value</b>          |
|------------|-----------------------------------------------|-------------------------|---------------------|-------------------------|
|            | CA1 s.p.                                      | t-test                  | ***                 | 9.13 x 10 <sup>-7</sup> |
|            | CA1 s.o.                                      | t-test                  | ***                 | 0.0002                  |
|            | CA1 s.r.                                      | t-test                  | ns                  | 0.1873                  |
|            | CA1 s.l.m                                     | t-test                  | ns                  | 0.4085                  |
|            | PrS                                           | t-test                  | *                   | 0.0156                  |
|            | RSG                                           | t-test                  | ns                  | 0.9823                  |
|            | Visual Ctx                                    | t-test                  | **                  | 0.0032                  |
|            | Auditory Ctx                                  | t-test                  | ns                  | 0.6044                  |
|            | TeA                                           | t-test                  | *                   | 0.0239                  |
|            | PRh/Ect                                       | t-test                  | ***                 | 0.0004                  |
|            | LEnt                                          | t-test                  | *                   | 0.0167                  |
|            | mEnt                                          | t-test                  | **                  | 0.0013                  |
|            | ACC                                           | t-test                  | *                   | 0.0175                  |
|            | MS-DB                                         | t-test                  | ns                  | 0.3070                  |
|            | AV Thalamus                                   | t-test                  | *                   | 0.0306                  |
| <b>%</b>   | <b>Comparisons of % of total input</b>        | <b>Statistic Method</b> | <b>Significance</b> | <b>P value</b>          |
|            | CA1 s.p.                                      | t-test                  | ***                 | 0.0006                  |
|            | CA1 s.o.                                      | t-test                  | ***                 | 1.75 x 10 <sup>-5</sup> |
|            | CA1 s.r.                                      | t-test                  | ns                  | 0.8087                  |
|            | CA1 s.l.m                                     | t-test                  | ns                  | 0.8440                  |
|            | PrS                                           | t-test                  | ns                  | 0.9580                  |
|            | RSG                                           | t-test                  | ns                  | 0.4002                  |
|            | Visual Ctx                                    | t-test                  | ***                 | 0.0006                  |
|            | Auditory Ctx                                  | t-test                  | ns                  | 0.1877                  |
|            | TeA                                           | t-test                  | *                   | 0.0186                  |
|            | PRh/Ect                                       | t-test                  | ***                 | 0.0001                  |
|            | LEnt                                          | t-test                  | **                  | 0.0083                  |
|            | mEnt                                          | t-test                  | **                  | 0.0018                  |
|            | ACC                                           | t-test                  | *                   | 0.0240                  |
|            | MS-DB                                         | t-test                  | ns                  | 0.4935                  |
|            | AV Thalamus                                   | t-test                  | ns                  | 0.2329                  |

**Supplementary Table 2a. Data for object-location and novel-object experiments with DREADDs-mediated inactivation of CA1-projecting subicular excitatory neurons**

| Object-location          | Training (10 min) |       | Testing (5min) |      |
|--------------------------|-------------------|-------|----------------|------|
|                          | Saline            | CNO   | Saline         | CNO  |
| Total Time (s)           | 20.83             | 20.67 | 8.24           | 7.40 |
| SE                       | 1.03              | 0.99  | 0.72           | 0.49 |
| Discrimination Index (%) | 0.51              | -0.88 | 22.31          | 4.60 |
| SE                       | 2.24              | 1.04  | 3.16           | 2.82 |

  

| Novel-object             | Training (10 min) |       | Testing (5min) |       |
|--------------------------|-------------------|-------|----------------|-------|
|                          | Saline            | CNO   | Saline         | CNO   |
| Total Time (s)           | 21.27             | 21.69 | 7.92           | 9.70  |
| SE                       | 1.16              | 1.72  | 1.05           | 0.75  |
| Discrimination Index (%) | -0.91             | 1.02  | 24.67          | 21.72 |
| SE                       | 2.24              | 0.72  | 5.22           | 6.30  |

**Supplementary Table 2b. Training and Testing data for object-location memory enhancement experiments with activation of CA1-projecting subicular neurons via optogenetic stimulation**

| Object-location          | Training (3 min)  |               |              | Testing (5 min)   |               |              |
|--------------------------|-------------------|---------------|--------------|-------------------|---------------|--------------|
|                          | Laser + EGFP ctrl | No laser ctrl | Laser + ChR2 | Laser + EGFP ctrl | No laser ctrl | Laser + ChR2 |
| Total Time (s)           | 4.18              | 4.19          | 3.78         | 5.99              | 6.14          | 7.09         |
| SE                       | 0.46              | 0.42          | 0.25         | 0.47              | 0.75          | 0.72         |
| Discrimination Index (%) | 0.70              | 1.82          | 0.15         | 3.43              | 2.10          | 25.25        |
| SE                       | 3.25              | 2.02          | 1.95         | 3.10              | 4.54          | 4.69         |

**Supplementary Table 3. Behavioral data of object-location memory experiments concurrent with miniscope imaging**

| Object-location tasks with miniscope imaging | Training (10 min) |      | Testing (10min) |      |
|----------------------------------------------|-------------------|------|-----------------|------|
|                                              | Saline            | CNO  | Saline          | CNO  |
| Total Time (s)                               | 8.76              | 9.06 | 8.70            | 9.18 |
| SE                                           | 1.08              | 0.86 | 0.85            | 0.80 |
| Discrimination Index (%)                     | -1.32             | 0.44 | 21.25           | 1.86 |
| SE                                           | 1.51              | 1.28 | 2.58            | 2.37 |

**Supplementary Table 4. Mouse strains and viral injections for the experiments**

| Mouse strain                | Virus Injection                                      | Target brain region       | Experiments performed                                                                                                                                                                     |
|-----------------------------|------------------------------------------------------|---------------------------|-------------------------------------------------------------------------------------------------------------------------------------------------------------------------------------------|
| Camk2a-Cre; TVA             | AAV8-EF1a-FLEX-HB<br>EnvA-SADΔG-mCherry              | Subiculum (AP: -3.40 mm)* | Rabies tracing of inputs to subicular excitatory neurons (n = 5)                                                                                                                          |
| Ai9 (RCL-tdTomato)          | CAV2-Cre                                             | CA1 (AP: -1.94 mm)*       | Verification of the efficiency and specificity of CAV2-Cre (n = 4)                                                                                                                        |
| C57BL/6                     | CAV2-Cre<br>AAV8-EF1a-FLEX-HTB<br>EnvA-SADΔG-mCherry | CA1                       | Rabies tracing of circuit inputs to CA1-projecting subicular excitatory neurons (n = 6)                                                                                                   |
|                             |                                                      | Subiculum                 |                                                                                                                                                                                           |
| C57BL/6                     | CAV2-Cre<br>H129DTK-TT (HSV)                         | CA1<br>Subiculum          | Anterograde HSV tracing of output projections of CA1-projecting subicular neurons (n = 5)                                                                                                 |
| C57BL/6                     | AAV2/1-CAG-ChR2-Venus                                | Subiculum                 | ChR2 photoactivation mediated circuit mapping (n = 5)                                                                                                                                     |
| C57BL/6                     | CAV2-Cre<br>AAV2-DIO-hM4D-mCherry                    | CA1<br>Subiculum          | Inactivation of CA1-projecting subicular neurons during object relocation (n = 21) and novel object recognition (n = 10) tasks, dry-land maze experiments (n = 10)                        |
| Camk2a-Cre                  | AAV2/1-CAG-ChR2-Venus<br>/ AAV2-DIO-hM4D-mCherry     | Subiculum                 | In vitro validation of optogenetic stimulation (n = 4) or hM4D-CNO mediated neuronal inhibition (n = 4)                                                                                   |
| Ai32 (RCL-ChR2(H134R)/EYFP) | rAAV2-retro-hSyn-Cre                                 | CA1                       | Optogenetic activation of CA1-projecting subicular neurons during object location memory training (n = 18)                                                                                |
| C57BL/6                     | rAAV2-retro-hSyn-EGFP                                | CA1                       | GFP control for optogenetic activation during object location memory experiment (n = 8)                                                                                                   |
| C57BL/6                     | CAV2-Cre                                             | CA1                       | Miniscope-based GCaMP6 imaging of CA1 place cells and genetic inactivation of CA1-projecting subicular neurons. Linear track (n = 9), open field (n = 8), object location memory (n = 21) |
|                             | AAV1-CamkII-GCaMP6f                                  | CA1 (AP: -2.04 mm)        |                                                                                                                                                                                           |
|                             | AAV2-DIO-hM4D-mCherry                                | Subiculum                 |                                                                                                                                                                                           |

\* Standard anterior-posterior values relative to the bregma (see the Methods) are used for injections in CA1 and the subiculum, except otherwise specified. For all the experiments, mice at 8-12 weeks old (either sex) were used for surgeries and had free access

to food and water in their home-cages before and after surgeries. Please refer to the main text and online methods for more detailed information.
